# Supplementary material for: Canine Smell Preferences—Do Dogs Have Their Favorite Scents?
Source: MDPI journal article supplement (doi:10.3390/ani12121488), 2022-06-08
Supplement: s1 [file s1]

**Supplementary Table S1. Arrangement of samples.**

| <b>Trial</b> | <b>Sample position</b> | <b>Day 1</b> | <b>Day 2</b> | <b>Day 3</b> | <b>Day 4</b> | <b>Day 5</b> | <b>Day 6</b> | <b>Day 7</b> | <b>Day 8</b> |
|--------------|------------------------|--------------|--------------|--------------|--------------|--------------|--------------|--------------|--------------|
| 1            | 1                      | 32           | 12           | 32           | 5            | 33           | 31           | 32           | 25           |
| 1            | 2                      | 32           | 15           | 33           | 31           | 32           | 1            | 32           | 1            |
| 1            | 3                      | 32           | 20           | 32           | 9            | 32           | 2            | 32           | 34           |
| 1            | 4                      | 32           | 16           | 32           | 23           | 32           | 16           | 33           | 8            |
| 2            | 1                      | 27           | 26           | 27           | 3            | 14           | 31           | 11           | 21           |
| 2            | 2                      | 17           | 13           | 25           | 16           | 22           | 6            | 31           | 32           |
| 2            | 3                      | 1            | 28           | 17           | 8            | 26           | 20           | 17           | 23           |
| 2            | 4                      | 21           | 24           | 31           | 31           | 30           | 7            | 14           | 26           |
| 3            | 1                      | 29           | 10           | 28           | 10           | 31           | 23           | 12           | 7            |
| 3            | 2                      | 18           | 4            | 32           | 22           | 32           | 25           | 4            | 28           |
| 3            | 3                      | 32           | 3            | 18           | 14           | 17           | 15           | 6            | 20           |
| 3            | 4                      | 31           | 6            | 31           | 31           | 3            | 10           | 30           | 31           |
| 4            | 1                      | 31           | 25           | 20           | 26           | 13           | 5            | 29           | 18           |
| 4            | 2                      | 2            | 23           | 1            | 30           | 31           | 4            | 22           | 5            |
| 4            | 3                      | 7            | 9            | 7            | 2            | 11           | 8            | 10           | 15           |
| 4            | 4                      | 14           | 11           | 13           | 4            | 12           | 24           | 13           | 2            |
| 5            | 1                      | 19           | 8            | 21           | 19           | 9            | 28           | 27           | 9            |
| 5            | 2                      | 5            | 31           | 29           | 11           | 19           | 18           | 24           | 31           |
| 5            | 3                      | 31           | 22           | 12           | 6            | 31           | 21           | 19           | 31           |
| 5            | 4                      | 31           | 30           | 24           | 15           | 29           | 27           | 16           | 3            |

Supplementary Table S2. Dog ethogram.

| Behavior Name             | Description                                               | Start code | Stop code | Behavior Type |
|---------------------------|-----------------------------------------------------------|------------|-----------|---------------|
| <b>AREAS</b>              | Being in sample area (mutually exclusive)                 |            |           | State Event   |
| Handler area              |                                                           | s5         |           | State Event   |
| Sample 1                  |                                                           | s1         | T         | State Event   |
| Sample 2                  |                                                           | s2         | R         | State Event   |
| Sample 3                  |                                                           | s3         | E         | State Event   |
| Sample 4                  |                                                           | s4         | F         | State Event   |
| <b>HEAD</b>               | Head of the dog being in sample area (mutually exclusive) |            |           | State Event   |
| Handler area              |                                                           | g5         | A         | State Event   |
| Sample 1                  |                                                           | g1         | G         | State Event   |
| Sample 2                  |                                                           | g2         | L         | State Event   |
| Sample 3                  |                                                           | g3         | O         | State Event   |
| Sample 4                  |                                                           | g4         | W         | State Event   |
| <b>SNIFFING</b>           | Sniffing in sample area (mutually exclusive)              |            |           | State Event   |
| Sample 1                  |                                                           | w1         | Z         | State Event   |
| Sample 2                  |                                                           | w2         | Y         | State Event   |
| Sample 3                  |                                                           | w3         |           | State Event   |
| Sample 4                  |                                                           | w4         |           | State Event   |
| Handler area              |                                                           | w5         | 5         | State Event   |
| <b>SPECIFIC SNIFFING</b>  | Clasification of sniffing type (mutually exclusive)       |            |           | State Event   |
| not sniffing              | Not interested in samples area                            | kw         | N         | State Event   |
| upper wind 1              | upper wind in sample area                                 | u1         | ku1       | State Event   |
| upper wind 2              | upper wind in sample area                                 | u2         | ku2       | State Event   |
| upper wind 3              | upper wind in sample area                                 | u3         | ku3       | State Event   |
| upper wind 4              | upper wind in sample area                                 | u4         | ku4       | State Event   |
| <b>NOSTRILS</b>           | clear view on which nostril is close to the sample        |            |           | State Event   |
| 1 sample left nostril     |                                                           | nl1        | kl1       | State Event   |
| 1 sample right nostril    |                                                           | np1        | kp1       | State Event   |
| 2 sample left nostril     |                                                           | nl2        | kl2       | State Event   |
| 2 sample right nostril    |                                                           | np2        | kp2       | State Event   |
| 3 sample left nostril     |                                                           | nl3        | kl3       | State Event   |
| 3 sample right nostril    |                                                           | np3        | kp3       | State Event   |
| 4 sample left nostril     |                                                           | nl4        | kl4       | State Event   |
| 4 sample right nostril    |                                                           | np4        | kp4       | State Event   |
| 1 sample whole nose touch |                                                           | c1         | kc1       | State Event   |
| 2 sample whole nose touch |                                                           | c2         | kc2       | State Event   |
| 3 sample whole nose touch |                                                           | c3         | kc3       | State Event   |
| 4 sample whole nose touch |                                                           | c4         | kc4       | State Event   |
| <b>LATENCY</b>            |                                                           |            |           | State Event   |
| latency 1                 | Time needed for dog to sniff the sample directly          | 1          | d1        | State Event   |
| latency 2                 | Time needed for dog to sniff the sample directly          | 2          | d2        | State Event   |

|           |                                                  |   |    |             |
|-----------|--------------------------------------------------|---|----|-------------|
| latency 3 | Time needed for dog to sniff the sample directly | 3 | d3 | State Event |
| latency 4 | Time needed for dog to sniff the sample directly | 4 | d4 | State Event |
